# Supplementary material for: Multi-level evidence of an allelic hierarchy of USH2A variants in hearing, auditory processing and speech/language outcomes
Source: PubMed Central journal article supplement (PMC7170883; doi:10.1038/s42003-020-0885-5), 2020-04-20
Supplement: 42003_2020_885_MOESM6_ESM.pdf [file 42003_2020_885_MOESM6_ESM.pdf]

## **Description of Additional Supplementary Files**

### **Supplementary Data sets (available as additional files)**

- **Supplementary Data 1 - Shared variants called in discovery family**
- **Supplementary Data 2 - SNPs with  $P \leq 10^{-5}$  in genome-wide interaction study and mapped genes**
- **Supplementary Data 3 - Data for murine auditory analyses (Data underlying Figure 2)**
- **Supplementary Data 4 - Data for murine auditory analyses (Data underlying Figure 3)**
